# Supplementary material for: A novel approach to synthesize ultrasmall Cu doped Zn–In–Se nanocrystal emitters in a colloidal system
Source: Royal Society of Chemistry journal article supplement (doi:10.1039/c3nr06168j), 2014-01-01
Supplement: c3nr06168j.pdf [file c3nr06168j.pdf]

## Supporting Information for

### A Novel Approach to Synthesize Ultrasmall Cu Doped Zn-In-Se Nanocrystal Emitters in a Colloidal System

Jun Ke,<sup>a</sup> Xinyong Li,<sup>\*ab</sup> Qidong Zhao,<sup>a</sup> Yong Shi,<sup>a</sup> and Guohua Chen<sup>b</sup>

<sup>a</sup> State Key Laboratory of Fine Chemical, Key Laboratory of Industrial Ecology and Environmental Engineering (MOE), School of Environmental Science and Technology, Dalian University of Technology, Dalian, China. E-mail: xyli@dlut.edu.cn

<sup>b</sup> Department of Chemical and Biomolecular Engineering, Hong Kong University of Science & Technology, Clear Water Bay, Kowloon, Hong Kong (China). E-mail: kechengh@ust.hk

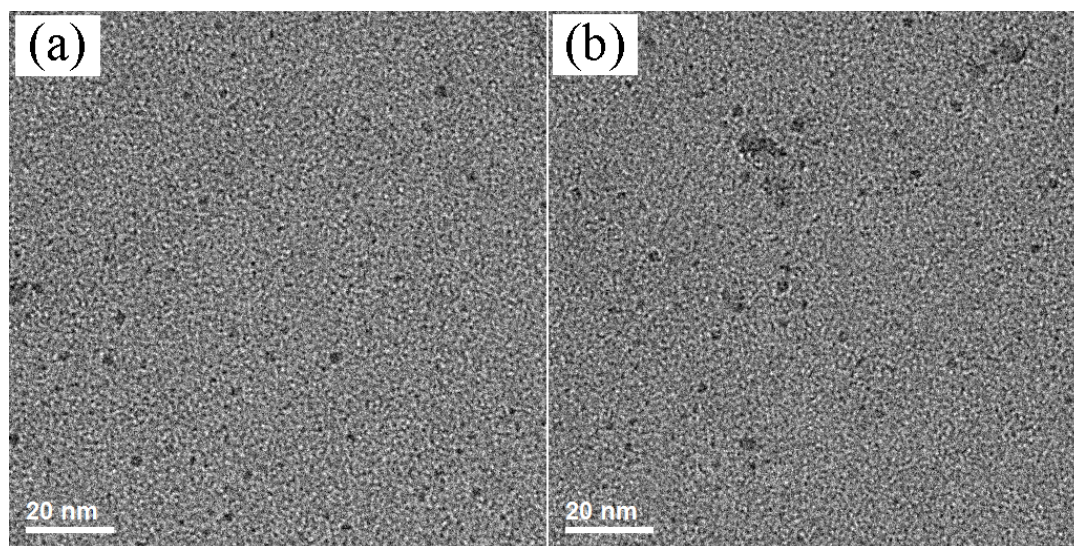

Fig. S1 TEM images of the NCs samples.
